# Supplementary material for: Concentric/bipolar ordering of liquid crystalline graphene oxide nanosheets confined in microfluidically synthesized spherical droplets
Source: Royal Society of Chemistry journal article supplement (doi:10.1039/d1tc01801a), 2021-01-01
Supplement: d1tc01801a1.pdf [file d1tc01801a1.pdf]

**Electronic Supplementary Information**

**Concentric/Bipolar Ordering of Liquid Crystalline  
Graphene Oxide Nanosheets Confined in Microfluidically  
Synthesized Spherical Droplets**

Ju Young Lee<sup>a</sup>, Min Jun Oh<sup>a</sup> and Pil J. Yoo<sup>\*ab</sup>

<sup>a</sup> School of Chemical Engineering, Sungkyunkwan University (SKKU), Suwon 16419, Republic of Korea.

<sup>b</sup> SKKU Advanced Institute of Nanoscience and Technology (SAINT), Sungkyunkwan University (SKKU), Suwon 16419, Republic of Korea.

E-mail: [pjyoo@skku.edu](mailto:pjyoo@skku.edu)

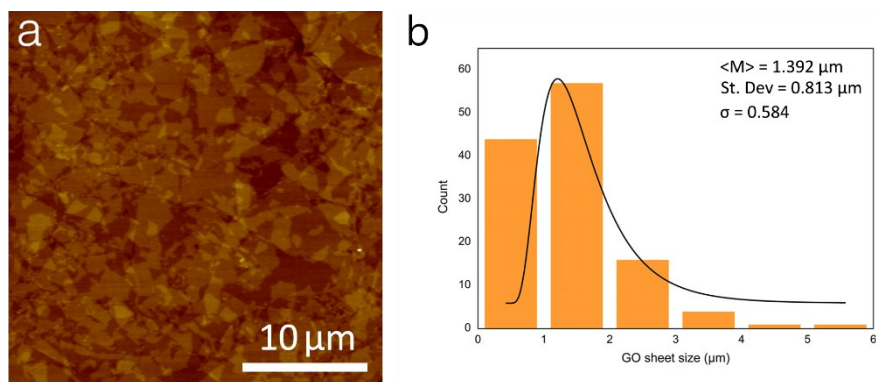

**Fig. S1** (a) AFM image of polydisperse standard GO nanosheets used for experiments (b) the size distribution of (a) standard GO nanosheets.  $\langle M \rangle$  is the mean sheet size of GO nanosheet. St. Dev is standard deviation and  $\sigma$  is normalized standard deviation.

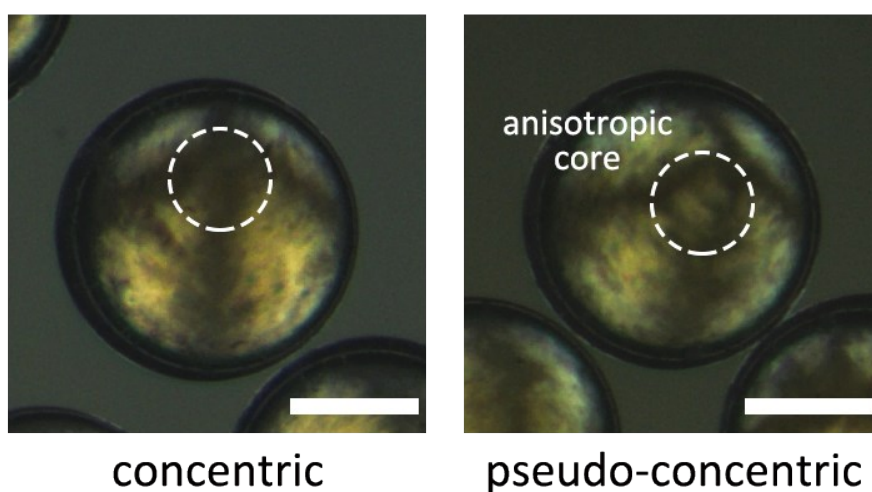

**Fig. S2** POM images of concentric and pseudo-concentric configurations collected from the microdroplets prepared from  $6 \text{ mg mL}^{-1}$  GO solutions with the size of  $220 < D (\mu\text{m}) < 230$ . The scale bars are  $100 \mu\text{m}$ .
